# Supplementary material for: Impact of Sapphire Step Height on the Growth of Monolayer Molybdenum Disulfide
Source: MDPI journal article supplement (doi:10.3390/nano13233056), 2023-11-30
Supplement: s1 [file s1]

# Impact of Sapphire Step Height on the Growth of Monolayer Molybdenum Disulfide

Jie Lu<sup>1, †</sup>, Miaomiao Zheng<sup>1, †</sup>, Jinxin Liu<sup>1</sup>, Yufeng Zhang<sup>1</sup>, Xueao Zhang<sup>1,2, \*</sup> and Weiwei Cai<sup>1,2, \*</sup>

<sup>1</sup> College of Physical Science and Technology, Xiamen University, Xiamen 361005, China;

<sup>2</sup> Jiujiang research institute of Xiamen University, Jiujiang 360404, China

\* Correspondence: xazhang@xmu.edu.cn (X.Z.); wwcai@xmu.edu.cn (W.C.).

<sup>†</sup> These authors contributed equally to this work.

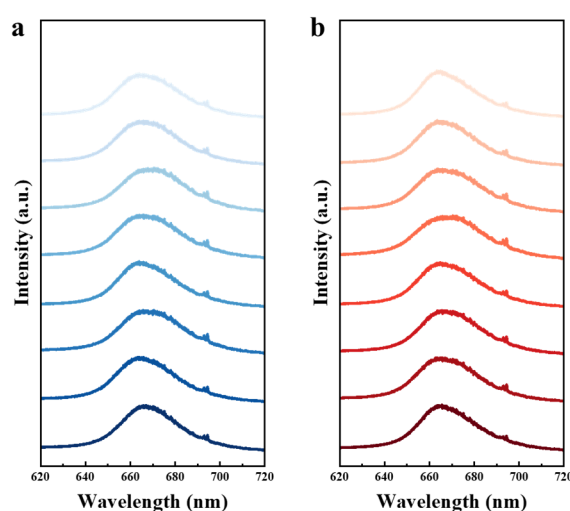

**Figure S1.** PL spectra of MoS<sub>2</sub> with triangle (a) and nanoribbon (b).

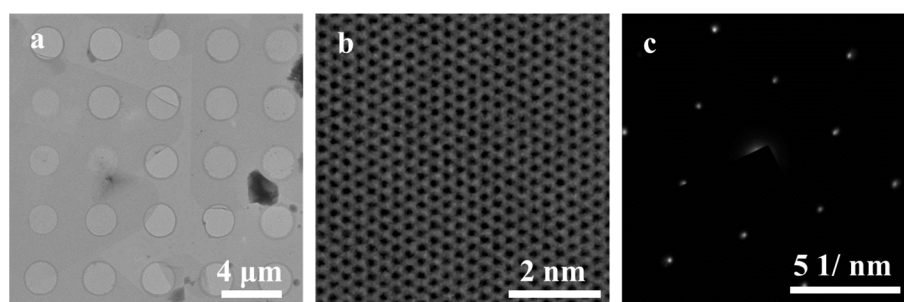

**Figure S2.** The crystallinity of triangle MoS<sub>2</sub>. (a) Low-magnification TEM image corresponding high-resolution TEM image (b) and SAED pattern (c).

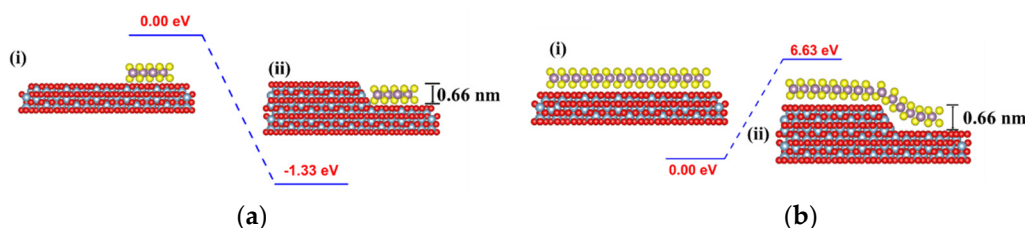

**Figure S3.** CP2K calculations about the growth. (a) Energy profiles of MoS<sub>2</sub> on a flat surface (i), attached to a 0.66 nm-high step (ii). (b) Energy profiles of MoS<sub>2</sub> on a flat surface (i), crossing a 0.66 nm-high step (ii). The binding energies of MoS<sub>2</sub> on a flat surface are set as energy references.
